# Supplementary material
Source: Springer Nature journal article supplement (https://www.springermedizin.de/resource/supplementary/12889_2013_6295_MOESM1_ESM.pdf/9496960)
Supplement: MOESM1 [file 9496960]

Baseline assessment and registration of consented participants

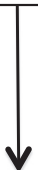

Randomisation

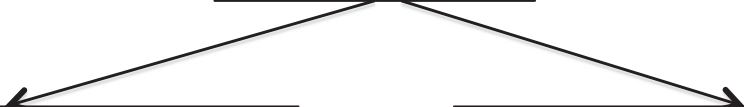

**Intervention**

- Usual care
- Participate in the 7 week Positive Outlook program

**Control**

- Usual care

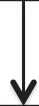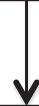

Post intervention data collection 8 weeks post randomisation

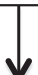

12 week follow up data collection
